# Supplementary material for: Effect of microbially available phosphorous removal on Legionella spp. in multi-storey residential dwellings in Latvia
Source: Royal Society of Chemistry journal article supplement (doi:10.1039/d3ew00588g), 2023-11-09
Supplement: d3ew00588g1.pdf [file d3ew00588g1.pdf]

## Effect of microbially available phosphorous removal on *Legionella* spp. in multi-storey residential dwelling in Latvia

Marta Zemīte<sup>a,b,d</sup>, Daina Pūle<sup>b,c</sup>, Olga Kiriļina-Gūtmane<sup>c</sup>, Laima Ķimse<sup>c</sup>, Mārtiņš Strods<sup>a</sup>, Jurgis Zemītis<sup>d</sup>, Linda Mežule<sup>a</sup>, Olga Valciņa<sup>c</sup>, Tālis Juhna<sup>a</sup>

<sup>a</sup> Water Research and Environmental Biotechnology Laboratory, Riga Technical University, Riga, Latvia,

<sup>b</sup> Department of Water Engineering and Technology, Riga Technical University, Riga, Latvia,

<sup>c</sup> The Institute of Food Safety, Animal Health, and Environment "BIOR", Riga, Latvia,

<sup>d</sup> Department of Heat Engineering and Technology, Riga Technical University, Riga, Latvia

**Table S1** shows electrical conductivity values for groundwater pumping stations "Baltezers", "Remberģi" and "Zaķumuiža". According to hydraulic modelling, performed by municipal water provider, the water from these plants reaches the pilot study area.

**Table S1.** Electrical conductivity values ( $\mu\text{S cm}^{-1}$ ) from groundwater pumping plants that are related to pilot site buildings' water supply.

| "Baltezers" |     |     | "Remberģi" |     |     | "Zaķumuiža" |     |     |
|-------------|-----|-----|------------|-----|-----|-------------|-----|-----|
| average     | min | max | average    | min | max | average     | min | max |
| 695         | 646 | 779 | 337        | 302 | 356 | 305         | 250 | 338 |

**Fig. S1** shows cumulative water consumption in both buildings, indicating greater water consumption around initial six weeks and more similar water usage during the remaining time. **Fig. S2** shows water consumption pattern that was similar in both buildings during the study time.

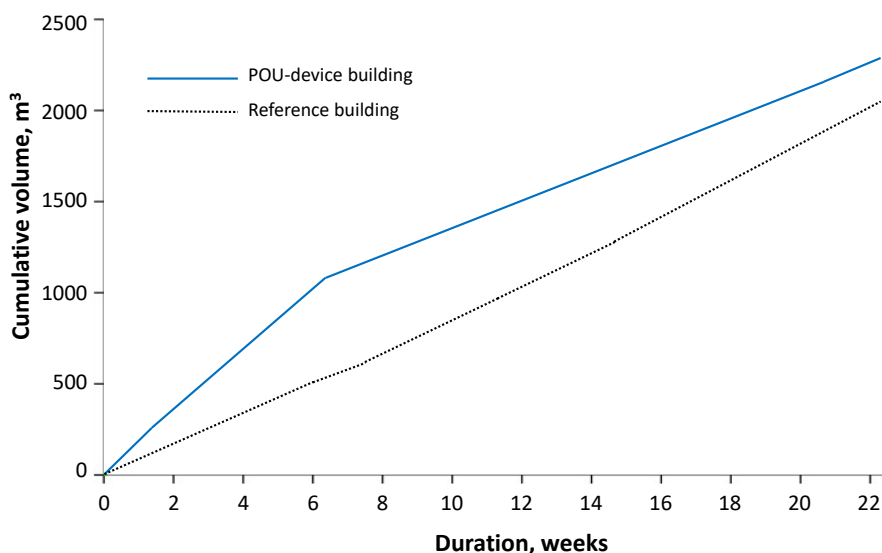

**Fig. S1** Cumulative water consumption throughout the sampling time.

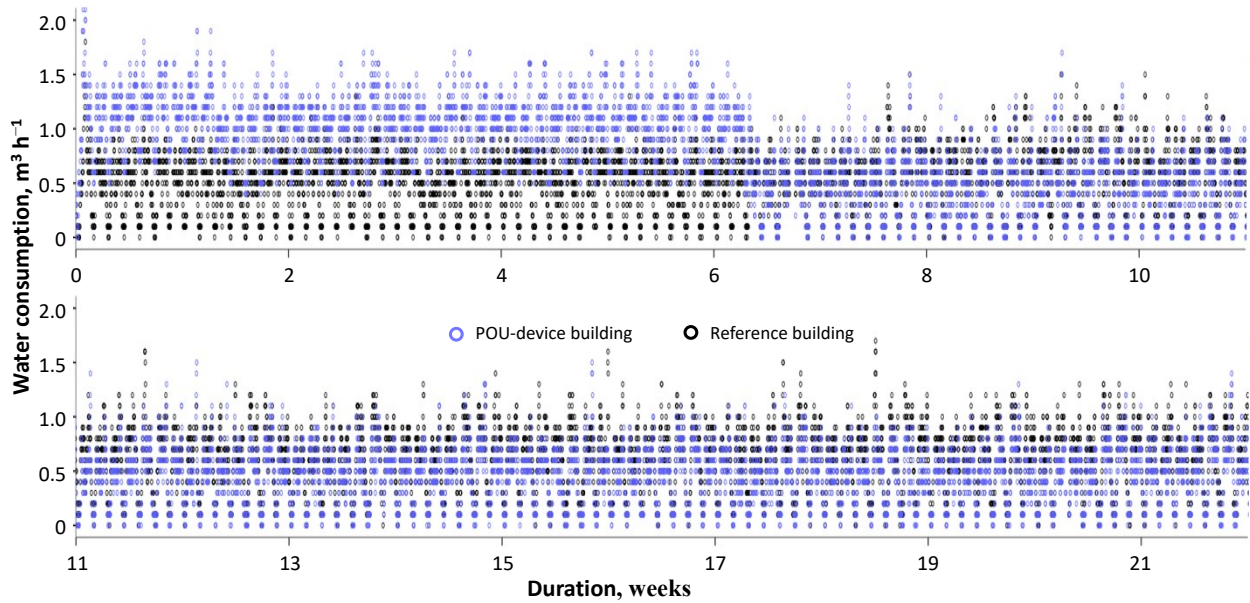

Fig. S2 Water consumption pattern through weeks 0-11 (top) and 11-22 (bottom).

**Table S2** summarises microbially available phosphorus (MAP) concentrations in samples collected from inlet water, domestic cold water (DCW) system and domestic hot water (DHW) system, and analysed by three different time intervals, representing the entire sampling period (samples from weeks 0-22), regular (samples from weeks 0-12) or dynamic (samples from weeks 16-22) heat exchanger setpoint. All samples were collected as grab-samples.

**Table S2.** Microbially available phosphorus (MAP) concentration in samples analysed for the entire sampling duration (weeks 0-22), Regular temperature setting (weeks 0-12), and Changed temperature setting (weeks 16-22).

| Sampling time                                                                                     | Microbially available phosphorus (MAP), $\mu\text{g l}^{-1}$ |                     | p-value <sup>a</sup> |
|---------------------------------------------------------------------------------------------------|--------------------------------------------------------------|---------------------|----------------------|
|                                                                                                   | Reference building                                           | POU-device building |                      |
| <i>Water inlet (from water main (Ref. building) or after sorption filter (POU-dev. building))</i> |                                                              |                     |                      |
| weeks 0-22, n=12 for each building                                                                | 10.29* (4.23)                                                | 3.56* (1.49)        | <b>&lt;0.001</b>     |
| weeks 0-12, n=6 for each building                                                                 | 11.81* (3.32)                                                | 2.93* (1.63)        | <b>&lt;0.001</b>     |
| weeks 16-22, n=6 for each building                                                                | 8.76* (4.77)                                                 | 4.19* (1.12)        | 0.066                |
| <i>DCW, kitchen taps</i>                                                                          |                                                              |                     |                      |
| weeks 0-22, n=33 (RB) and 39 (POU)                                                                | 1.06 (0-14.14)                                               | 0 (0-4.28)          | <b>&lt;0.001</b>     |
| weeks 0-12, n=17 (RB) and 22 (POU)                                                                | 2.69 (0-12.60)                                               | 0.41 (0-4.28)       | <b>0.001</b>         |
| weeks 16-22, n=16 (RB) and 17 (POU)                                                               | 0.67 (0-14.14)                                               | 0 (0-0.18)          | <b>0.001</b>         |
| <i>DHW, showerheads</i>                                                                           |                                                              |                     |                      |
| weeks 0-22, n=33 (RB) and 39 (POU)                                                                | 0.33 (0-9.01)                                                | 0 (0-9.31)          | <b>0.012</b>         |
| weeks 0-12, n=17 (RB) and 22 (POU)                                                                | 2.01 (0-9.01)                                                | 0.36 (0-9.31)       | <b>0.018</b>         |
| weeks 16-22, n=16 (RB) and 17 (POU)                                                               | 0 (0-3.66)                                                   | 0 (0-0.08)          | <b>0.014</b>         |
| <i>DHW, circulation return</i>                                                                    |                                                              |                     |                      |
| weeks 0-22, n=12 for each building                                                                | 1.45* (1.64)                                                 | 0.20 (0-4.95)       | 0.060                |
| weeks 0-12, n=6 for each building                                                                 | 2.41* (1.79)                                                 | 0.57 (0-4.95)       | 0.132                |
| weeks 16-22, n=6 for each building                                                                | 0.49* (0.72)                                                 | 0 (0-0.26)          | <b>0.001</b>         |

<sup>a</sup> 2-tailed significance used for normally distributed data or exact significance value for non-parametric independent samples t-test.

<sup>b</sup> Total Cell Count = Intact Cell Count + Damaged Cell Count.

**Mean\*** (standard deviation) values are presented for normally distributed data or otherwise, **Median** (min-max) is used.

**Tables S3** and **S4** represent characteristics of domestic hot water (DHW) grab samples, collected from showerheads (first draw) and circulation return. The analysis summary corresponds to the entire sampling time (weeks 0-22). **Table S3** summarises data for Reference building, while **Table S4** is for POU-device building.

**Table S3.** Characteristics of domestic hot water samples of the Reference building.

| Parameter                                                  | DHW, showerhead (n=33)                                              | DHW, circulation return (n=12)                 | p-value <sup>a</sup> |
|------------------------------------------------------------|---------------------------------------------------------------------|------------------------------------------------|----------------------|
| <i>Physical and chemical parameters</i>                    |                                                                     |                                                |                      |
| Temperature, °C                                            | 21.94* (2.29)                                                       | 44.35* (2.62)                                  | <b>&lt;0.001</b>     |
| pH                                                         | 8.00* (0.12)                                                        | 8.23* (0.11)                                   | <b>&lt;0.001</b>     |
| Electrical conductivity, µS cm <sup>-1</sup>               | 303 (270-602)                                                       | 315.42* (40.12)                                | 0.409                |
| Ca, mg l <sup>-1</sup>                                     | 36.93* (4.27)                                                       | 35.47* (3.04)                                  | 0.282                |
| Mg, mg l <sup>-1</sup>                                     | 10.8 (8.5-16.3)                                                     | 10.0 (8.5-11.3)                                | 0.424                |
| Mn, mg l <sup>-1</sup>                                     | 0.014 (0.008-0.178)                                                 | 0.014 (0.011-0.081)                            | 1.000                |
| Cu, µg l <sup>-1</sup>                                     | 142 (73-289)                                                        | 99 (30)                                        | <b>0.002</b>         |
| Zn, mg l <sup>-1</sup>                                     | 0.052 (0.027-0.142)                                                 | 0.042 (0.033-0.076)                            | 0.052                |
| Fe, mg l <sup>-1</sup>                                     | 0.032 (0-0.122)                                                     | 0.061* (0.047)                                 | 0.115                |
| Pb, µg l <sup>-1</sup>                                     | 2.20 (1.45-9.87)                                                    | 2.84 (1.70-6.36)                               | 0.109                |
| <i>Main microbial nutrients</i>                            |                                                                     |                                                |                      |
| Total organic carbon (TOC), mg l <sup>-1</sup>             | 1.57 (1.04-8.14)                                                    | 1.42 (1.03-4.18)                               | 0.409                |
| Microbially available phosphorus (MAP), µg l <sup>-1</sup> | 0.33 (0-9.01)                                                       | 1.45* (1.64)                                   | 0.367                |
| <i>Microbiological parameters</i>                          |                                                                     |                                                |                      |
| Total Cell Count, cells ml <sup>-1</sup> <sup>b</sup>      | 3.31x10 <sup>5</sup> (1.11x10 <sup>5</sup> - 8.71x10 <sup>5</sup> ) | 2.25x10 <sup>5</sup> * (9.47x10 <sup>4</sup> ) | <b>0.007</b>         |
| Damaged Cell Count, cells ml <sup>-1</sup>                 | 9.61x10 <sup>4</sup> (6.06x10 <sup>4</sup> - 3.31x10 <sup>5</sup> ) | 8.43x10 <sup>4</sup> * (2.36x10 <sup>4</sup> ) | 0.142                |
| Intact Cell Count (ICC), cells ml <sup>-1</sup>            | 2.73x10 <sup>5</sup> * (1.59x10 <sup>5</sup> )                      | 1.41x10 <sup>5</sup> * (7.97x10 <sup>4</sup> ) | <b>0.001</b>         |
| Low Nucleic Acid content cells, % ICC                      | 24.65 (6.32-68.13)                                                  | 35.76* (10.99)                                 | <b>0.009</b>         |
| High Nucleic Acid content cells, % ICC                     | 75.35 (31.87-93.81)                                                 | 64.32* (11.01)                                 | <b>0.009</b>         |
| <i>L. pneumophila</i> , CFU l <sup>-1</sup>                | 400 (0-3100)                                                        | 100 (0-2600)                                   | 0.409                |

<sup>a</sup> 2-tailed significance used for normally distributed data or exact significance value for non-parametric independent samples t-test.

<sup>b</sup> Total Cell Count = Intact Cell Count + Damaged Cell Count.

**Mean\*** (standard deviation) values are presented for normally distributed data or otherwise, **Median** (min-max) is used.

**Table S4.** Characteristics of domestic hot water samples of the POU-device building.

| Parameter                                    | DHW, showerhead (n=39) | DHW, circulation return (n=12) | p-value <sup>a</sup> |
|----------------------------------------------|------------------------|--------------------------------|----------------------|
| <i>Physical and chemical parameters</i>      |                        |                                |                      |
| Temperature, °C                              | 30.40 (15.9-43.9)      | 45.85* (2.06)                  | <b>&lt;0.001</b>     |
| pH                                           | 7.98* (0.15)           | 8.09* (0.11)                   | <b>0.025</b>         |
| Electrical conductivity, µS cm <sup>-1</sup> | 384 (293-524)          | 373.5* (51.3)                  | 0.222                |
| Ca, mg l <sup>-1</sup>                       | 38.80 (31.4-42.3)      | 37.47* (3.03)                  | 0.339                |
| Mg, mg l <sup>-1</sup>                       | 11.75* (1.12)          | 10.98* (0.97)                  | <b>0.036</b>         |
| Mn, mg l <sup>-1</sup>                       | 0.008 (0-0.397)        | 0.11 (0.005-0.099)             | 0.131                |
| Cu, µg l <sup>-1</sup>                       | 232 (38.8-2421)        | 157.8* (103.5)                 | <b>0.079</b>         |
| Zn, mg l <sup>-1</sup>                       | 0.097 (0.046-0.627)    | 0.078* (0.042)                 | <b>0.012</b>         |

|                                                            |                                                                     |                                                |                  |
|------------------------------------------------------------|---------------------------------------------------------------------|------------------------------------------------|------------------|
| Fe, mg l <sup>-1</sup>                                     | 0 (0-1240)                                                          | 0.155 (0.041-0.553)                            | <b>&lt;0.001</b> |
| Pb, µg l <sup>-1</sup>                                     | 2.77 (0-133)                                                        | 4.29* (2.64)                                   | 0.689            |
| <i>Main microbial nutrients</i>                            |                                                                     |                                                |                  |
| Total organic carbon (TOC), mg l <sup>-1</sup>             | 2.21 (1.46-8.57)                                                    | 1.97 (1.37-4.29)                               | 0.152            |
| Microbially available phosphorus (MAP), µg l <sup>-1</sup> | 0 (0-9.31)                                                          | 0.2 (0-4.95)                                   | 0.307            |
| <i>Microbiological parameters</i>                          |                                                                     |                                                |                  |
| Total Cell Count, cells ml <sup>-1</sup> <sup>b</sup>      | 4.12x10 <sup>5</sup> (1.28x10 <sup>5</sup> - 9.57x10 <sup>5</sup> ) | 3.12x10 <sup>5</sup> * (7.39x10 <sup>4</sup> ) | <b>0.008</b>     |
| Damaged Cell Count, cells ml <sup>-1</sup>                 | 1.13x10 <sup>5</sup> (7.50x10 <sup>4</sup> - 5.09x10 <sup>5</sup> ) | 1.17x10 <sup>5</sup> * (3.25x10 <sup>4</sup> ) | 0.318            |
| Intact Cell Count (ICC), cells ml <sup>-1</sup>            | 3.13x10 <sup>5</sup> * (1.67x10 <sup>5</sup> )                      | 1.95x10 <sup>5</sup> * (6.65x10 <sup>4</sup> ) | <b>0.001</b>     |
| Low Nucleic Acid content cells, % ICC                      | 25.29 (12.78-74.03)                                                 | 24.47 (18.11-58.15)                            | 0.756            |
| High Nucleic Acid content cells, % ICC                     | 74.64 (26.15-87.28)                                                 | 75.41 (42.15-81.53)                            | 0.657            |
| <i>L. pneumophila</i> , CFU l <sup>-1</sup>                | 400 (0-9500)                                                        | 1925 (0-10 000)                                | 0.304            |

<sup>a</sup> 2-tailed significance used for normally distributed data or exact significance value for non-parametric independent samples t-test.

<sup>b</sup> Total Cell Count = Intact Cell Count + Damaged Cell Count.

**Mean\*** (standard deviation) values are presented for normally distributed data or otherwise, **Median** (min-max) is used.

**Tables S5** and **S6** represent microbiological characteristics of domestic hot water (DHW) grab samples, collected from showerheads (first draw) and circulation return within two different temperature-setting periods. Mean (standard deviation) values are presented for normally distributed data or otherwise, Median (min-max) is used, and the analysis summary corresponds to the entire sampling time (weeks 0-22). **Table S5** summarises data for the showerhead samples, while **Table S6** is for circulation return samples.

**Table S5.** Microbiological characteristics of domestic hot water showerhead first-draw samples.

| Parameter                                                                             | Reference building                                                  | POU-device building                                                 | p-value <sup>a</sup> |
|---------------------------------------------------------------------------------------|---------------------------------------------------------------------|---------------------------------------------------------------------|----------------------|
| <i>Regular temperature setting (samples from weeks 0-12), n=17 (RB) and 22 (POU)</i>  |                                                                     |                                                                     |                      |
| Total Cell Count, cells ml <sup>-1</sup> <sup>b</sup>                                 | 4.75x10 <sup>5</sup> * (2.36x10 <sup>5</sup> )                      | 5.09x10 <sup>5</sup> * (2.56x10 <sup>5</sup> )                      | 0.675                |
| Damaged Cell Count, cells ml <sup>-1</sup>                                            | 1.03x10 <sup>5</sup> (6.06x10 <sup>4</sup> - 3.31x10 <sup>5</sup> ) | 1.11x10 <sup>5</sup> (7.50x10 <sup>4</sup> - 5.09x10 <sup>5</sup> ) | 0.347                |
| Intact Cell Count (ICC), cells ml <sup>-1</sup>                                       | 3.38x10 <sup>5</sup> * (1.73x10 <sup>5</sup> )                      | 3.50x10 <sup>5</sup> * (1.99x10 <sup>5</sup> )                      | 0.837                |
| Low Nucleic Acid content cells, % ICC                                                 | 21.99 (6.32-68.13)                                                  | 25.28 (12.78-74.03)                                                 | 0.210                |
| High Nucleic Acid content cells, % ICC                                                | 77.67 (31.87-93.81)                                                 | 74.48 (26.15-87.28)                                                 | 0.232                |
| <i>L. pneumophila</i> , CFU l <sup>-1</sup>                                           | 150 (0-3100)                                                        | 150 (0-700)                                                         | 0.124                |
| <i>Changed temperature setting (samples from weeks 16-22), n=16 (RB) and 17 (POU)</i> |                                                                     |                                                                     |                      |
| Total Cell Count, cells ml <sup>-1</sup> <sup>b</sup>                                 | 2.51x10 <sup>5</sup> (1.62x10 <sup>5</sup> - 6.53x10 <sup>5</sup> ) | 4.02x10 <sup>5</sup> * (1.34x10 <sup>5</sup> )                      | <b>0.028</b>         |
| Damaged Cell Count, cells ml <sup>-1</sup>                                            | 8.47x10 <sup>4</sup> (6.09x10 <sup>4</sup> - 2.21x10 <sup>5</sup> ) | 1.18x10 <sup>5</sup> (7.61x10 <sup>4</sup> - 2.53x10 <sup>5</sup> ) | <b>0.025</b>         |
| Intact Cell Count (ICC), cells ml <sup>-1</sup>                                       | 1.68x10 <sup>5</sup> (9.06x10 <sup>4</sup> - 4.51x10 <sup>5</sup> ) | 2.64x10 <sup>5</sup> * (9.93x10 <sup>4</sup> )                      | 0.081                |
| Low Nucleic Acid content cells, % ICC                                                 | 27.63* (10.32)                                                      | 26.12* (2.25)                                                       | 0.605                |
| High Nucleic Acid content cells, % ICC                                                | 72.41* (10.30)                                                      | 73.92* (5.25)                                                       | 0.606                |
| <i>L. pneumophila</i> , CFU l <sup>-1</sup>                                           | 550 (0-3000)                                                        | 4335* (3202)                                                        | <b>&lt;0.001</b>     |

<sup>a</sup> 2-tailed significance used for normally distributed data or exact significance value for non-parametric independent samples t-test.

<sup>b</sup> Total Cell Count = Intact Cell Count + Damaged Cell Count.

**Mean\*** (standard deviation) values are presented for normally distributed data or otherwise, **Median** (min-max) is used.

**Table S6.** Microbiological characteristics of domestic hot water circulation return samples.

| Parameter                                                          | Reference building                             | POU-device building                            | p-value <sup>a</sup> |
|--------------------------------------------------------------------|------------------------------------------------|------------------------------------------------|----------------------|
| <i>Regular temperature setting (samples from weeks 0-12), n=6</i>  |                                                |                                                |                      |
| Total Cell Count, cells ml <sup>-1</sup> <sup>b</sup>              | 2.82x10 <sup>5</sup> * (1.03x10 <sup>5</sup> ) | 2.94x10 <sup>5</sup> * (8.48x10 <sup>4</sup> ) | 0.825                |
| Damaged Cell Count, cells ml <sup>-1</sup>                         | 9.44x10 <sup>4</sup> * (2.35x10 <sup>4</sup> ) | 1.03x10 <sup>5</sup> * (2.77x10 <sup>4</sup> ) | 0.555                |
| Intact Cell Count (ICC), cells ml <sup>-1</sup>                    | 1.87x10 <sup>5</sup> * (8.95x10 <sup>4</sup> ) | 1.90x10 <sup>5</sup> * (8.28x10 <sup>4</sup> ) | 0.948                |
| Low Nucleic Acid content cells, % ICC                              | 36.02* (15.41)                                 | 30.89* (14.29)                                 | 0.564                |
| High Nucleic Acid content cells, % ICC                             | 64.04* (15.41)                                 | 69.05* (14.08)                                 | 0.569                |
| <i>L. pneumophila</i> , CFU l <sup>-1</sup>                        | 75 (0-1200)                                    | 125 (0-3100)                                   | 0.394                |
| <i>Changed temperature setting (samples from weeks 16-22), n=6</i> |                                                |                                                |                      |
| Total Cell Count, cells ml <sup>-1</sup> <sup>b</sup>              | 1.69x10 <sup>5</sup> * (4.05x10 <sup>4</sup> ) | 3.31x10 <sup>5</sup> * (6.34x10 <sup>4</sup> ) | <b>&lt;0.001</b>     |
| Damaged Cell Count, cells ml <sup>-1</sup>                         | 7.43x10 <sup>4</sup> * (2.06x10 <sup>4</sup> ) | 1.31x10 <sup>5</sup> * (3.30x10 <sup>4</sup> ) | <b>0.006</b>         |
| Intact Cell Count (ICC), cells ml <sup>-1</sup>                    | 9.51x10 <sup>4</sup> * (2.96x10 <sup>4</sup> ) | 2.00x10 <sup>5</sup> * (5.32x10 <sup>4</sup> ) | <b>0.002</b>         |
| Low Nucleic Acid content cells, % ICC                              | 35.50* (5.31)                                  | 23.68 (21.87-33.38)                            | 0.065                |
| High Nucleic Acid content cells, % ICC                             | 64.59* (5.41)                                  | 76.27 (66.86-78.26)                            | <b>0.026</b>         |
| <i>L. pneumophila</i> , CFU l <sup>-1</sup>                        | 900* (1008)                                    | 6042* (3790)                                   | <b>0.020</b>         |

<sup>a</sup> 2-tailed significance used for normally distributed data or exact significance value for non-parametric independent samples t-test.

<sup>b</sup> Total Cell Count = Intact Cell Count + Damaged Cell Count.

**Mean\*** (standard deviation) values are presented for normally distributed data or otherwise, **Median** (min-max) is used.

**Table S7** summarises the characteristics of water entering the internal water supply of both buildings. Only the values that are significantly different are shown. The values for the Reference building represent the main water inlet, while the values for the POU-device building represent samples collected after passing the sorption filter. Mean (standard deviation) values are presented for normally distributed data or otherwise, Median (min-max) is used, and the analysis summary corresponds to the entire sampling time (weeks 0-22). All samples were collected as grab-samples.

**Table S7.** Characteristics of water entering the internal water supply network.

| Parameter                                                           | DHW, showerhead (n=39)                                              | DHW, circulation return (n=12)                 | p-value <sup>a</sup> |
|---------------------------------------------------------------------|---------------------------------------------------------------------|------------------------------------------------|----------------------|
| <i>Changed temperature setting (samples from weeks 16-22), n=12</i> |                                                                     |                                                |                      |
| Electrical conductivity, $\mu\text{S cm}^{-1}$                      | 282.67* (11.98)                                                     | 367.17* (25.77)                                | <b>&lt;0.001</b>     |
| Ca, mg l <sup>-1</sup>                                              | 36.08* (1.93)                                                       | 39.28* (1.49)                                  | <b>0.009</b>         |
| Mg, mg l <sup>-1</sup>                                              | 9.52* (1.18)                                                        | 11.10* (1.15)                                  | <b>0.040</b>         |
| Mn, mg l <sup>-1</sup>                                              | 0.032 (0.018-0.102)                                                 | 0.014* (0.010)                                 | <b>0.026</b>         |
| Cu, $\mu\text{g l}^{-1}$                                            | 6.2 (3.1-31.2)                                                      | 0 (0-6.1)                                      | <b>0.015</b>         |
| Fe, mg l <sup>-1</sup>                                              | 0.153 (0.096-0.652)                                                 | 0.045* (0.046)                                 | <b>0.015</b>         |
| Total organic carbon (TOC), mg l <sup>-1</sup>                      | 1.39* (0.37)                                                        | 2.15* (0.32)                                   | <b>0.003</b>         |
| Intact Cell Count (ICC), cells ml <sup>-1</sup>                     | 8.36x10 <sup>4</sup> (6.62x10 <sup>4</sup> - 1.87x10 <sup>5</sup> ) | 1.59x10 <sup>5</sup> * (7.11x10 <sup>4</sup> ) | <b>0.041</b>         |
| Low Nucleic Acid content cells, % ICC                               | 41.42* (4.47)                                                       | 31.91* (4.28)                                  | <b>0.004</b>         |
| High Nucleic Acid content cells, % ICC                              | 58.67* (4.41)                                                       | 68.06* (4.16)                                  | <b>0.004</b>         |

<sup>a</sup> 2-tailed significance used for normally distributed data or exact significance value for non-parametric independent samples t-test.

**Mean\*** (standard deviation) values are presented for normally distributed data or otherwise, **Median** (min-max) is used.
